# Supplementary material for: Oxytocin receptors in the Magel2 mouse model of autism: Specific region, age, sex and oxytocin treatment effects
Source: Front Neurosci. 2023 Mar 14;17:1026939. doi: 10.3389/fnins.2023.1026939 (PMC10043208; doi:10.3389/fnins.2023.1026939)
Supplement: Supplementary file 2 [file Table_1.XLSX]

## Sheet: Suppl Table 1 
Supplementary table1 for Fig.2: Datasets and statistical analysis
DATASETS							3 way ANOVA				MULTIPLE COMPARISONS (meaningful interactions)
Brain region	Age	Genotype	Sex	Num. of mice	Num. of datapoints	Mean ± SEM	Source of variation	F (DFn, DFd)	P value	Summary	Tukey's multiple comp. test	Adjusted P Value	Summary
LS	P8	WT	M	3	24	0.3557±0.008754	Time point	F (1, 191) = 53.45	P<0.0001	****	P8:Males WT-Veh vs. P8:Females WT-Veh	0.985	ns
	P8	WT	F	3	22	0.3401±0.01864	Genotype	F (1, 191) = 139.7	P<0.0001	****	P8:Males WT-Veh vs. P8:Males KO-Veh	<0.0001	****
	P8	Magel2-KO	M	3	29	0.1627±0.006174	Sex	F (1, 191) = 3.078	P=0.0810	ns	P8:Males WT-Veh vs. P90:Males WT-Veh	<0.0001	****
	P8	Magel2-KO	F	3	36	0.1656±0.003602	Time point x Genotype	F (1, 191) = 98.31	P<0.0001	****	P8:Females WT-Veh vs. P8:Females KO-Veh	<0.0001	****
	P90	WT	M	3	24	0.158±0.0165	Time point x Sex	F (1, 191) = 6.298	P=0.0129	*	P8:Females WT-Veh vs. P90:Females WT-Veh	<0.0001	****
	P90	WT	F	3	16	0.2464±0.01419	Genotype x Sex	F (1, 191) = 6.501	P=0.0116	*	P8:Males KO-Veh vs. P8:Females KO-Veh	>0.9999	ns
	P90	Magel2-KO	M	3	24	0.1943±0.01612	Time point x Genotype x Sex	F (1, 191) = 13.27	P=0.0003	***	P8:Males KO-Veh vs. P90:Males KO-Veh	0.5082	ns
	P90	Magel2-KO	F	3	24	0.178±0.01008					P8:Females KO-Veh vs. P90:Females KO-Veh	0.9924	ns
											P90:Males WT-Veh vs. P90:Females WT-Veh	0.0001	***
											P90:Males WT-Veh vs. P90:Males KO-Veh	0.3831	ns
											P90:Females WT-Veh vs. P90:Females KO-Veh	0.0083	**
											P90:Males KO-Veh vs. P90:Females KO-Veh	0.9782	ns
Brain region	Age	Genotype	Sex	Num. of mice	Num. of datapoints	Mean ± SEM	Source of variation	F (DFn, DFd)	P value	Summary	Tukey's multiple comp. test	Adjusted P Value	Summary
CeA	P8	WT	M	3	27	0.3431±0.01139	Time point	F (1, 177) = 191.2	P<0.0001	****	P8:Males WT-Veh vs. P8:Females WT-Veh	0.8105	ns
	P8	WT	F	3	23	0.3667±0.01544	Genotype	F (1, 177) = 103.8	P<0.0001	****	P8:Males WT-Veh vs. P8:Males KO-Veh	<0.0001	****
	P8	Magel2-KO	M	3	24	0.166±0.008721	Sex	F (1, 177) = 16.16	P<0.0001	****	P8:Males WT-Veh vs. P90:Males WT-Veh	<0.0001	****
	P8	Magel2-KO	F	3	24	0.188±0.004702	Time point x Genotype	F (1, 177) = 130.8	P<0.0001	****	P8:Females WT-Veh vs. P8:Females KO-Veh	<0.0001	****
	P90	WT	M	3	22	0.1019±0.01252	Time point x Sex	F (1, 177) = 1.565	P=0.2127	ns	P8:Females WT-Veh vs. P90:Females WT-Veh	<0.0001	****
	P90	WT	F	3	23	0.1922±0.0118	Genotype x Sex	F (1, 177) = 8.410	P=0.0042	**	P8:Males KO-Veh vs. P8:Females KO-Veh	0.8723	ns
	P90	Magel2-KO	M	3	22	0.1591±0.01236	Time point x Genotype x Sex	F (1, 177) = 7.834	P=0.0057	**	P8:Males KO-Veh vs. P90:Males KO-Veh	0.9999	ns
	P90	Magel2-KO	F	3	20	0.1556±0.01369					P8:Females KO-Veh vs. P90:Females KO-Veh	0.5389	ns
											P90:Males WT-Veh vs. P90:Females WT-Veh	<0.0001	****
											P90:Males WT-Veh vs. P90:Males KO-Veh	0.0185	*
											P90:Females WT-Veh vs. P90:Females KO-Veh	0.3889	ns
											P90:Males KO-Veh vs. P90:Females KO-Veh	>0.9999	ns
Brain region	Age	Genotype	Sex	Num. of mice	Num. of datapoints	Mean ± SEM	Source of variation	F (DFn, DFd)	P value	Summary	Tukey's multiple comp. test	Adjusted P Value	Summary
MeA	P8	WT	M	3	25	0.2814±0.00961	Time point	F (1, 174) = 9.126	P=0.0029	**	P8:Males WT-Veh vs. P8:Females WT-Veh	0.9986	ns
	P8	WT	F	3	21	0.292±0.0123	Genotype	F (1, 174) = 76.54	P<0.0001	****	P8:Males WT-Veh vs. P8:Males KO-Veh	<0.0001	****
	P8	Magel2-KO	M	3	23	0.1465±0.00657	Sex	F (1, 174) = 12.36	P=0.0006	***	P8:Males WT-Veh vs. P90:Males WT-Veh	<0.0001	****
	P8	Magel2-KO	F	3	23	0.1408±0.00577	Time point x Genotype	F (1, 174) = 60.54	P<0.0001	****	P8:Females WT-Veh vs. P8:Females KO-Veh	<0.0001	****
	P90	WT	M	3	22	0.1347±0.01444	Time point x Sex	F (1, 174) = 10.45	P=0.0015	**	P8:Females WT-Veh vs. P90:Females WT-Veh	0.3056	ns
	P90	WT	F	3	23	0.2517±0.01544	Genotype x Sex	F (1, 174) = 14.90	P=0.0002	***	P8:Males KO-Veh vs. P8:Females KO-Veh	>0.9999	ns
	P90	Magel2-KO	M	3	23	0.1849±0.01378	Time point x Genotype x Sex	F (1, 174) = 8.491	P=0.0040	**	P8:Males KO-Veh vs. P90:Males KO-Veh	0.3361	ns
	P90	Magel2-KO	F	3	22	0.1847±0.0162					P8:Females KO-Veh vs. P90:Females KO-Veh	0.1911	ns
											P90:Males WT-Veh vs. P90:Females WT-Veh	<0.0001	****
											P90:Males WT-Veh vs. P90:Males KO-Veh	0.081	ns
											P90:Females WT-Veh vs. P90:Females KO-Veh	0.004	**
											P90:Males KO-Veh vs. P90:Females KO-Veh	>0.9999	ns
Brain region	Age	Genotype	Sex	Num. of mice	Num. of datapoints	Mean ± SEM	Source of variation	F (DFn, DFd)	P value	Summary	Tukey's multiple comp. test	Adjusted P Value	Summary
BLA	P8	WT	M	3	23	0.2176±0.01389	Time point	F (1, 175) = 15.82	P=0.0001	***	P8:Males WT-Veh vs. P8:Females WT-Veh	0.952	ns
	P8	WT	F	3	23	0.1994±0.01411	Genotype	F (1, 175) = 23.10	P<0.0001	****	P8:Males WT-Veh vs. P8:Males KO-Veh	<0.0001	****
	P8	Magel2-KO	M	3	23	0.1223±0.006608	Sex	F (1, 175) = 4.518	P=0.0350	*	P8:Males WT-Veh vs. P90:Males WT-Veh	<0.0001	****
	P8	Magel2-KO	F	3	24	0.1215±0.005362	Time point x Genotype	F (1, 175) = 33.55	P<0.0001	****	P8:Females WT-Veh vs. P8:Females KO-Veh	<0.0001	****
	P90	WT	M	3	20	0.08061±0.0123	Time point x Sex	F (1, 175) = 10.81	P=0.0012	**	P8:Females WT-Veh vs. P90:Females WT-Veh	0.858	ns
	P90	WT	F	3	23	0.1767±0.01343	Genotype x Sex	F (1, 175) = 6.944	P=0.0092	**	P8:Males KO-Veh vs. P8:Females KO-Veh	>0.9999	ns
	P90	Magel2-KO	M	3	23	0.1405±0.01296	Time point x Genotype x Sex	F (1, 175) = 13.70	P=0.0003	***	P8:Males KO-Veh vs. P90:Males KO-Veh	0.9522	ns
	P90	Magel2-KO	F	3	24	0.1329±0.01074					P8:Females KO-Veh vs. P90:Females KO-Veh	0.9964	ns
											P90:Males WT-Veh vs. P90:Females WT-Veh	<0.0001	****
											P90:Males WT-Veh vs. P90:Males KO-Veh	0.0116	*
											P90:Females WT-Veh vs. P90:Females KO-Veh	0.125	ns
											P90:Males KO-Veh vs. P90:Females KO-Veh	0.9998	ns
Brain region	Age	Genotype	Sex	Num. of mice	Num. of datapoints	Mean ± SEM	Source of variation	F (DFn, DFd)	P value	Summary	Tukey's multiple comp. test	Adjusted P Value	Summary
dCA2/CA3	P8	WT	M	3	27	0.1401±0.008618	Time point	F (1, 176) = 138.0	P<0.0001	****	P8:Males WT-Veh vs. P8:Females WT-Veh	0.7284	ns
	P8	WT	F	3	20	0.1637±0.01044	Genotype	F (1, 176) = 0.4860	P=0.4866	ns	P8:Males WT-Veh vs. P8:Males KO-Veh	0.052	ns
	P8	Magel2-KO	M	3	24	0.0982±0.003452	Sex	F (1, 176) = 13.02	P=0.0004	***	P8:Males WT-Veh vs. P90:Males WT-Veh	0.9897	ns
	P8	Magel2-KO	F	3	23	0.09606±0.003069	Time point x Genotype	F (1, 176) = 46.85	P<0.0001	****	P8:Females WT-Veh vs. P8:Females KO-Veh	0.0003	***
	P90	WT	M	3	24	0.1518±0.01502	Time point x Sex	F (1, 176) = 4.544	P=0.0344	*	P8:Females WT-Veh vs. P90:Females WT-Veh	0.0022	**
	P90	WT	F	3	24	0.2232±0.01419	Genotype x Sex	F (1, 176) = 8.615	P=0.0038	**	P8:Males KO-Veh vs. P8:Females KO-Veh	>0.9999	ns
	P90	Magel2-KO	M	3	24	0.2262±0.01027	Time point x Genotype x Sex	F (1, 176) = 1.352	P=0.2464	ns	P8:Males KO-Veh vs. P90:Males KO-Veh	<0.0001	****
	P90	Magel2-KO	F	3	18	0.2381±0.008527					P8:Females KO-Veh vs. P90:Females KO-Veh	<0.0001	****
											P90:Males WT-Veh vs. P90:Females WT-Veh	<0.0001	****
											P90:Males WT-Veh vs. P90:Males KO-Veh	<0.0001	****
											P90:Females WT-Veh vs. P90:Females KO-Veh	0.9773	ns
											P90:Males KO-Veh vs. P90:Females KO-Veh	0.9939	ns
Brain region	Age	Genotype	Sex	Num. of mice	Num. of datapoints	Mean ± SEM	Source of variation	F (DFn, DFd)	P value	Summary	Tukey's multiple comp. test	Adjusted P Value	Summary
vCA2/CA3	P8	WT	M	3	18	0.186±0.01224	Time point	F (1, 160) = 114.2	P<0.0001	****	P8:Males WT-Veh vs. P8:Females WT-Veh	0.9682	ns
	P8	WT	F	3	14	0.2064±0.009704	Genotype	F (1, 160) = 94.90	P<0.0001	****	P8:Males WT-Veh vs. P8:Males KO-Veh	<0.0001	****
	P8	Magel2-KO	M	3	23	0.1001±0.004882	Sex	F (1, 160) = 13.55	P=0.0003	***	P8:Males WT-Veh vs. P90:Males WT-Veh	0.1558	ns
	P8	Magel2-KO	F	3	24	0.08966±0.005013	Time point x Genotype	F (1, 160) = 3.962	P=0.0482	*	P8:Females WT-Veh vs. P8:Females KO-Veh	<0.0001	****
	P90	WT	M	3	20	0.233±0.01756	Time point x Sex	F (1, 160) = 9.680	P=0.0022	**	P8:Females WT-Veh vs. P90:Females WT-Veh	<0.0001	****
	P90	WT	F	3	21	0.3096±0.01428	Genotype x Sex	F (1, 160) = 3.736	P=0.0550	ns	P8:Males KO-Veh vs. P8:Females KO-Veh	0.998	ns
	P90	Magel2-KO	M	3	24	0.184±0.01392	Time point x Genotype x Sex	F (1, 160) = 0.02176	P=0.8829	ns	P8:Males KO-Veh vs. P90:Males KO-Veh	<0.0001	****
	P90	Magel2-KO	F	3	24	0.2247±0.01254					P8:Females KO-Veh vs. P90:Females KO-Veh	<0.0001	****
											P90:Males WT-Veh vs. P90:Females WT-Veh	0.0004	***
											P90:Males WT-Veh vs. P90:Males KO-Veh	0.0723	ns
											P90:Females WT-Veh vs. P90:Females KO-Veh	<0.0001	****
											P90:Males KO-Veh vs. P90:Females KO-Veh	0.1793	ns
Brain region	Age	Genotype	Sex	Num. of mice	Num. of datapoints	Mean ± SEM	Source of variation	F (DFn, DFd)	P value	Summary	Tukey's multiple comp. test	Adjusted P Value	Summary
DG	P8	WT	M	3	22	0.1873±0.007519	Time point	F (1, 170) = 32.51	P<0.0001	****	P8:Males WT-Veh vs. P8:Females WT-Veh	0.9635	ns
	P8	WT	F	3	16	0.2041±0.01019	Genotype	F (1, 170) = 10.44	P=0.0015	**	P8:Males WT-Veh vs. P8:Males KO-Veh	0.0041	**
	P8	Magel2-KO	M	3	24	0.1323±0.003741	Sex	F (1, 170) = 2.493	P=0.1162	ns	P8:Males WT-Veh vs. P90:Males WT-Veh	0.0473	*
	P8	Magel2-KO	F	3	24	0.1061±0.005792	Time point x Genotype	F (1, 170) = 52.48	P<0.0001	****	P8:Females WT-Veh vs. P8:Females KO-Veh	<0.0001	****
	P90	WT	M	3	23	0.1428±0.01397	Time point x Sex	F (1, 170) = 4.935	P=0.0276	*	P8:Females WT-Veh vs. P90:Females WT-Veh	0.8517	ns
	P90	WT	F	3	24	0.2261±0.01134	Genotype x Sex	F (1, 170) = 27.93	P<0.0001	****	P8:Males KO-Veh vs. P8:Females KO-Veh	0.5648	ns
	P90	Magel2-KO	M	3	23	0.2277±0.01002	Time point x Genotype x Sex	F (1, 170) = 5.437	P=0.0209	*	P8:Males KO-Veh vs. P90:Males KO-Veh	<0.0001	****
	P90	Magel2-KO	F	3	22	0.1998±0.01464					P8:Females KO-Veh vs. P90:Females KO-Veh	<0.0001	****
											P90:Males WT-Veh vs. P90:Females WT-Veh	<0.0001	****
											P90:Males WT-Veh vs. P90:Males KO-Veh	<0.0001	****
											P90:Females WT-Veh vs. P90:Females KO-Veh	0.5905	ns
											P90:Males KO-Veh vs. P90:Females KO-Veh	0.5296	ns
Brain region	Age	Genotype	Sex	Num. of mice	Num. of datapoints	Mean ± SEM	Source of variation	F (DFn, DFd)	P value	Summary	Tukey's multiple comp. test	Adjusted P Value	Summary
PVT	P8	WT	M	3	26	0.5242±0.03579	Time point	F (1, 152) = 97.55	P<0.0001	****	P8:Males WT-Veh vs. P8:Females WT-Veh	0.4489	ns
	P8	WT	F	3	24	0.5925±0.03958	Genotype	F (1, 152) = 52.83	P<0.0001	****	P8:Males WT-Veh vs. P8:Males KO-Veh	<0.0001	****
	P8	Magel2-KO	M	3	31	0.2526±0.009956	Sex	F (1, 152) = 1.250	P=0.2653	ns	P8:Males WT-Veh vs. P90:Males WT-Veh	<0.0001	****
	P8	Magel2-KO	F	3	34	0.2225±0.01083	Time point x Genotype	F (1, 152) = 67.20	P<0.0001	****	P8:Females WT-Veh vs. P8:Females KO-Veh	<0.0001	****
	P90	WT	M	3	12	0.1849±0.01332	Time point x Sex	F (1, 152) = 0.03812	P=0.8455	ns	P8:Females WT-Veh vs. P90:Females WT-Veh	<0.0001	****
	P90	WT	F	3	12	0.182±0.02392	Genotype x Sex	F (1, 152) = 0.2088	P=0.6484	ns	P8:Males KO-Veh vs. P8:Females KO-Veh	0.9693	ns
	P90	Magel2-KO	M	3	11	0.174±0.02126	Time point x Genotype x Sex	F (1, 152) = 3.659	P=0.0576	ns	P8:Males KO-Veh vs. P90:Males KO-Veh	0.5487	ns
	P90	Magel2-KO	F	3	10	0.2314±0.01682					P8:Females KO-Veh vs. P90:Females KO-Veh	>0.9999	ns
											P90:Males WT-Veh vs. P90:Females WT-Veh	>0.9999	ns
											P90:Males WT-Veh vs. P90:Males KO-Veh	>0.9999	ns
											P90:Females WT-Veh vs. P90:Females KO-Veh	0.9761	ns
											P90:Males KO-Veh vs. P90:Females KO-Veh	0.9516	ns
Brain region	Age	Genotype	Sex	Num. of mice	Num. of datapoints	Mean ± SEM	Source of variation	F (DFn, DFd)	P value	Summary	Tukey's multiple comp. test	Adjusted P Value	Summary
MPOA	P8	WT	M	3	26	0.1843±0.008398	Time point	F (1, 159) = 115.2	P<0.0001	****	P8:Males WT-Veh vs. P8:Females WT-Veh	0.7955	ns
	P8	WT	F	3	18	0.2026±0.008104	Genotype	F (1, 159) = 57.54	P<0.0001	****	P8:Males WT-Veh vs. P8:Males KO-Veh	<0.0001	****
	P8	Magel2-KO	M	3	18	0.1244±0.007656	Sex	F (1, 159) = 6.972	P=0.0091	**	P8:Males WT-Veh vs. P90:Males WT-Veh	<0.0001	****
	P8	Magel2-KO	F	3	24	0.1145±0.004122	Time point x Genotype	F (1, 159) = 19.69	P<0.0001	****	P8:Females WT-Veh vs. P8:Females KO-Veh	<0.0001	****
	P90	WT	M	3	20	0.07528±0.009934	Time point x Sex	F (1, 159) = 3.834	P=0.0520	ns	P8:Females WT-Veh vs. P90:Females WT-Veh	<0.0001	****
	P90	WT	F	3	16	0.1248±0.01327	Genotype x Sex	F (1, 159) = 8.231	P=0.0047	**	P8:Males KO-Veh vs. P8:Females KO-Veh	0.9924	ns
	P90	Magel2-KO	M	3	21	0.07711±0.009611	Time point x Genotype x Sex	F (1, 159) = 0.3332	P=0.5646	ns	P8:Males KO-Veh vs. P90:Males KO-Veh	0.006	**
	P90	Magel2-KO	F	3	24	0.08421±0.007805					P8:Females KO-Veh vs. P90:Females KO-Veh	0.1398	ns
											P90:Males WT-Veh vs. P90:Females WT-Veh	0.0057	**
											P90:Males WT-Veh vs. P90:Males KO-Veh	>0.9999	ns
											P90:Females WT-Veh vs. P90:Females KO-Veh	0.0344	*
											P90:Males KO-Veh vs. P90:Females KO-Veh	0.9988	ns
Brain region	Age	Genotype	Sex	Num. of mice	Num. of datapoints	Mean ± SEM	Source of variation	F (DFn, DFd)	P value	Summary	Tukey's multiple comp. test	Adjusted P Value	Summary
VMH	P8	WT	M	3	10	0.1642±0.02472	Time point	F (1, 143) = 70.27	P<0.0001	****	P8:Males WT-Veh vs. P8:Females WT-Veh	>0.9999	ns
	P8	WT	F	3	12	0.1557±0.005051	Genotype	F (1, 143) = 17.03	P<0.0001	****	P8:Males WT-Veh vs. P8:Males KO-Veh	0.2659	ns
	P8	Magel2-KO	M	3	24	0.08321±0.004854	Sex	F (1, 143) = 15.16	P=0.0002	***	P8:Males WT-Veh vs. P90:Males WT-Veh	0.9934	ns
	P8	Magel2-KO	F	3	23	0.06176±0.00556	Time point x Genotype	F (1, 143) = 2.219	P=0.1385	ns	P8:Females WT-Veh vs. P8:Females KO-Veh	0.0798	ns
	P90	WT	M	3	22	0.1916±0.01965	Time point x Sex	F (1, 143) = 23.57	P<0.0001	****	P8:Females WT-Veh vs. P90:Females WT-Veh	<0.0001	****
	P90	WT	F	3	23	0.3432±0.03977	Genotype x Sex	F (1, 143) = 0.4848	P=0.4874	ns	P8:Males KO-Veh vs. P8:Females KO-Veh	0.9924	ns
	P90	Magel2-KO	M	3	22	0.1658±0.01358	Time point x Genotype x Sex	F (1, 143) = 0.07870	P=0.7795	ns	P8:Males KO-Veh vs. P90:Males KO-Veh	0.0502	ns
	P90	Magel2-KO	F	3	15	0.2869±0.01241					P8:Females KO-Veh vs. P90:Females KO-Veh	<0.0001	****
											P90:Males WT-Veh vs. P90:Females WT-Veh	<0.0001	****
											P90:Males WT-Veh vs. P90:Males KO-Veh	0.9812	ns
											P90:Females WT-Veh vs. P90:Females KO-Veh	0.577	ns
											P90:Males KO-Veh vs. P90:Females KO-Veh	0.0027	**
Brain region	Age	Genotype	Sex	Num. of mice	Num. of datapoints	Mean ± SEM	Source of variation	F (DFn, DFd)	P value	Summary	Tukey's multiple comp. test	Adjusted P Value	Summary
Pir	P8	WT	M	3	20	0.317±0.01321	Time point	F (1, 117) = 1.434	P=0.2336	ns	P8:Males WT-Veh vs. P8:Females WT-Veh	0.5929	ns
	P8	WT	F	3	16	0.3474±0.01994	Genotype	F (1, 117) = 140.1	P<0.0001	****	P8:Males WT-Veh vs. P8:Males KO-Veh	<0.0001	****
	P8	Magel2-KO	M	3	20	0.1532±0.005721	Sex	F (1, 117) = 0.3826	P=0.5374	ns	P8:Males WT-Veh vs. P90:Males WT-Veh	<0.0001	****
	P8	Magel2-KO	F	3	21	0.1411±0.005241	Time point x Genotype	F (1, 117) = 73.11	P<0.0001	****	P8:Females WT-Veh vs. P8:Females KO-Veh	<0.0001	****
	P90	WT	M	3	12	0.2291±0.01563	Time point x Sex	F (1, 117) = 0.1502	P=0.6991	ns	P8:Females WT-Veh vs. P90:Females WT-Veh	0.239	ns
	P90	WT	F	3	12	0.3018±0.01071	Genotype x Sex	F (1, 117) = 25.61	P<0.0001	****	P8:Males KO-Veh vs. P8:Females KO-Veh	0.9933	ns
	P90	Magel2-KO	M	3	12	0.2699±0.01188	Time point x Genotype x Sex	F (1, 117) = 7.368	P=0.0076	**	P8:Males KO-Veh vs. P90:Males KO-Veh	<0.0001	****
	P90	Magel2-KO	F	3	12	0.2014±0.01559					P8:Females KO-Veh vs. P90:Females KO-Veh	0.0211	*
											P90:Males WT-Veh vs. P90:Females WT-Veh	0.0102	*
											P90:Males WT-Veh vs. P90:Males KO-Veh	0.4684	ns
											P90:Females WT-Veh vs. P90:Females KO-Veh	<0.0001	****
											P90:Males KO-Veh vs. P90:Females KO-Veh	0.0198	*
