# Supplementary material for: Oxytocin receptors in the Magel2 mouse model of autism: Specific region, age, sex and oxytocin treatment effects
Source: Front Neurosci. 2023 Mar 14;17:1026939. doi: 10.3389/fnins.2023.1026939 (PMC10043208; doi:10.3389/fnins.2023.1026939)
Supplement: Supplementary file 3 [file Table_2.XLSX]

## Sheet: Suppl Table 2
Supplementary table 2 for Fig.3: Datasets and statistical analysis
DATASETS								3 way ANOVA				MULTIPLE COMPARISONS (meaningful interactions)
Brain region	Genotype	Age	Treatment	Sex	Num. of mice	Num. of datapoints	Mean ± SEM	Source of variation	F (DFn, DFd)	P value	Summary	Tukey's multiple comp. test	Adjusted P Value	Summary
LS	Magel2-KO	P8	Veh	M	3	29	0.1627±0.006174	Time point	F (1, 204) = 2.466	P=0.1179	ns	P8:Males KO-Veh vs. P8:Females KO-Veh	>0.9999	ns
	Magel2-KO	P8	Veh	F	3	36	0.1656±0.003602	Treatment	F (1, 204) = 9.228	P=0.0027	**	P8:Males KO-Veh vs. P8:Males KO-OXT	0.9999	ns
	Magel2-KO	P8	OXT	M	3	30	0.1576±0.007123	Sex	F (1, 204) = 2.471	P=0.1175	ns	P8:Males KO-Veh vs. P90:Males KO-Veh	0.2235	ns
	Magel2-KO	P8	OXT	F	3	23	0.1548±0.00495	Time point x Treatment	F (1, 204) = 3.300	P=0.0707	ns	P8:Females KO-Veh vs. P8:Females KO-OXT	0.9887	ns
	Magel2-KO	P90	Veh	M	3	24	0.1943±0.01612	Time point x Sex	F (1, 204) = 2.467	P=0.1178	ns	P8:Females KO-Veh vs. P90:Females KO-Veh	0.9725	ns
	Magel2-KO	P90	Veh	F	3	24	0.178±0.01008	Treatment x Sex	F (1, 204) = 0.2891	P=0.5914	ns	P8:Males KO-OXT vs. P8:Females KO-OXT	>0.9999	ns
	Magel2-KO	P90	OXT	M	3	22	0.1669±0.009667	Time point x Treatment x Sex	F (1, 204) = 0.009455	P=0.9226	ns	P8:Males KO-OXT vs. P90:Males KO-OXT	0.9968	ns
	Magel2-KO	P90	OXT	F	3	24	0.1423±0.01339					P8:Females KO-OXT vs. P90:Females KO-OXT	0.9846	ns
												P90:Males KO-Veh vs. P90:Females KO-Veh	0.9288	ns
												P90:Males KO-Veh vs. P90:Males KO-OXT	0.4923	ns
												P90:Females KO-Veh vs. P90:Females KO-OXT	0.1463	ns
												P90:Males KO-OXT vs. P90:Females KO-OXT	0.6343	ns
Brain region	Genotype	Age	Treatment	Sex	Num. of mice	Num. of datapoints	Mean ± SEM	Source of variation	F (DFn, DFd)	P value	Summary	Tukey's multiple comp. test	Adjusted P Value	Summary
CeA	Magel2-KO	P8	Veh	M	3	24	0.166±0.008721	Time point	F (1, 161) = 44.43	P<0.0001	****	P8:Males KO-Veh vs. P8:Females KO-Veh	0.7761	ns
	Magel2-KO	P8	Veh	F	3	24	0.188±0.004702	Treatment	F (1, 161) = 7.638	P=0.0064	**	P8:Males KO-Veh vs. P8:Males KO-OXT	0.6446	ns
	Magel2-KO	P8	OXT	M	3	24	0.1909±0.00509	Sex	F (1, 161) = 2.919	P=0.0895	ns	P8:Males KO-Veh vs. P90:Males KO-Veh	0.9997	ns
	Magel2-KO	P8	OXT	F	3	16	0.183±0.009062	Time point x Treatment	F (1, 161) = 16.60	P<0.0001	****	P8:Females KO-Veh vs. P8:Females KO-OXT	>0.9999	ns
	Magel2-KO	P90	Veh	M	3	22	0.1591±0.01236	Time point x Sex	F (1, 161) = 0.6203	P=0.4321	ns	P8:Females KO-Veh vs. P90:Females KO-Veh	0.3637	ns
	Magel2-KO	P90	Veh	F	3	20	0.1556±0.01369	Treatment x Sex	F (1, 161) = 0.2454	P=0.6210	ns	P8:Males KO-OXT vs. P8:Females KO-OXT	0.9996	ns
	Magel2-KO	P90	OXT	M	3	18	0.08461±0.01329	Time point x Treatment x Sex	F (1, 161) = 6.070	P=0.0148	*	P8:Males KO-OXT vs. P90:Males KO-OXT	<0.0001	****
	Magel2-KO	P90	OXT	F	3	21	0.1261±0.01553					P8:Females KO-OXT vs. P90:Females KO-OXT	0.0134	*
												P90:Males KO-Veh vs. P90:Females KO-Veh	>0.9999	ns
												P90:Males KO-Veh vs. P90:Males KO-OXT	0.0001	***
												P90:Females KO-Veh vs. P90:Females KO-OXT	0.5333	ns
												P90:Males KO-OXT vs. P90:Females KO-OXT	0.1501	ns
Brain region	Genotype	Age	Treatment	Sex	Num. of mice	Num. of datapoints	Mean ± SEM	Source of variation	F (DFn, DFd)	P value	Summary	Tukey's multiple comp. test	Adjusted P Value	Summary
MeA	Magel2-KO	P8	Veh	M	3	23	0.1465±0.00657	Time point	F (1, 169) = 7.653	P=0.0063	**	P8:Males KO-Veh vs. P8:Females KO-Veh	>0.9999	ns
	Magel2-KO	P8	Veh	F	3	23	0.1408±0.00577	Treatment	F (1, 169) = 3.592	P=0.0598	ns	P8:Males KO-Veh vs. P8:Males KO-OXT	>0.9999	ns
	Magel2-KO	P8	OXT	M	3	24	0.1487±0.005485	Sex	F (1, 169) = 0.003116	P=0.9556	ns	P8:Males KO-Veh vs. P90:Males KO-Veh	0.1932	ns
	Magel2-KO	P8	OXT	F	3	16	0.1479±0.008075	Time point x Treatment	F (1, 169) = 6.231	P=0.0135	*	P8:Females KO-Veh vs. P8:Females KO-OXT	0.9999	ns
	Magel2-KO	P90	Veh	M	3	23	0.1849±0.01378	Time point x Sex	F (1, 169) = 0.2217	P=0.6383	ns	P8:Females KO-Veh vs. P90:Females KO-Veh	0.0894	ns
	Magel2-KO	P90	Veh	F	3	22	0.1847±0.0162	Treatment x Sex	F (1, 169) = 0.1902	P=0.6633	ns	P8:Males KO-OXT vs. P8:Females KO-OXT	>0.9999	ns
	Magel2-KO	P90	OXT	M	3	22	0.1462±0.01277	Time point x Treatment x Sex	F (1, 169) = 0.01410	P=0.9056	ns	P8:Males KO-OXT vs. P90:Males KO-OXT	>0.9999	ns
	Magel2-KO	P90	OXT	F	3	24	0.1547±0.01262					P8:Females KO-OXT vs. P90:Females KO-OXT	>0.9999	ns
												P90:Males KO-Veh vs. P90:Females KO-Veh	>0.9999	ns
												P90:Males KO-Veh vs. P90:Males KO-OXT	0.1973	ns
												P90:Females KO-Veh vs. P90:Females KO-OXT	0.5059	ns
												P90:Males KO-OXT vs. P90:Females KO-OXT	0.9993	ns
Brain region	Genotype	Age	Treatment	Sex	Num. of mice	Num. of datapoints	Mean ± SEM	Source of variation	F (DFn, DFd)	P value	Summary	Tukey's multiple comp. test	Adjusted P Value	Summary
BLA	Magel2-KO	P8	Veh	M	3	23	0.1223±0.006608	Time point	F (1, 166) = 2.539	P=0.1129	ns	P8:Males KO-Veh vs. P8:Females KO-Veh	>0.9999	ns
	Magel2-KO	P8	Veh	F	3	24	0.1215±0.005362	Treatment	F (1, 166) = 2.755	P=0.0988	ns	P8:Males KO-Veh vs. P8:Males KO-OXT	>0.9999	ns
	Magel2-KO	P8	OXT	M	3	24	0.1177±0.005037	Sex	F (1, 166) = 0.09582	P=0.7573	ns	P8:Males KO-Veh vs. P90:Males KO-Veh	0.911	ns
	Magel2-KO	P8	OXT	F	3	16	0.107±0.01085	Time point x Treatment	F (1, 166) = 0.1516	P=0.6975	ns	P8:Females KO-Veh vs. P8:Females KO-OXT	0.9842	ns
	Magel2-KO	P90	Veh	M	3	23	0.1405±0.01296	Time point x Sex	F (1, 166) = 0.2089	P=0.6483	ns	P8:Females KO-Veh vs. P90:Females KO-Veh	0.9923	ns
	Magel2-KO	P90	Veh	F	3	24	0.1329±0.01074	Treatment x Sex	F (1, 166) = 0.06131	P=0.8047	ns	P8:Males KO-OXT vs. P8:Females KO-OXT	0.9975	ns
	Magel2-KO	P90	OXT	M	3	21	0.1165±0.01566	Time point x Treatment x Sex	F (1, 166) = 0.8247	P=0.3651	ns	P8:Males KO-OXT vs. P90:Males KO-OXT	>0.9999	ns
	Magel2-KO	P90	OXT	F	3	19	0.1262±0.01374					P8:Females KO-OXT vs. P90:Females KO-OXT	0.9422	ns
												P90:Males KO-Veh vs. P90:Females KO-Veh	0.9995	ns
												P90:Males KO-Veh vs. P90:Males KO-OXT	0.7345	ns
												P90:Females KO-Veh vs. P90:Females KO-OXT	0.9998	ns
												P90:Males KO-OXT vs. P90:Females KO-OXT	0.9984	ns
Brain region	Genotype	Age	Treatment	Sex	Num. of mice	Num. of datapoints	Mean ± SEM	Source of variation	F (DFn, DFd)	P value	Summary	Tukey's multiple comp. test	Adjusted P Value	Summary
dCA2/CA3	Magel2-KO	P8	Veh	M	3	24	0.0982±0.003452	Time point	F (1, 167) = 295.3	P<0.0001	****	P8:Males KO-Veh vs. P8:Females KO-Veh	>0.9999	ns
	Magel2-KO	P8	Veh	F	3	23	0.09606±0.003069	Treatment	F (1, 167) = 16.69	P<0.0001	****	P8:Males KO-Veh vs. P8:Males KO-OXT	0.986	ns
	Magel2-KO	P8	OXT	M	3	23	0.08689±0.003199	Sex	F (1, 167) = 0.2536	P=0.6152	ns	P8:Males KO-Veh vs. P90:Males KO-Veh	<0.0001	****
	Magel2-KO	P8	OXT	F	3	16	0.09675±0.006528	Time point x Treatment	F (1, 167) = 10.77	P=0.0013	**	P8:Females KO-Veh vs. P8:Females KO-OXT	>0.9999	ns
	Magel2-KO	P90	Veh	M	3	24	0.2262±0.01027	Time point x Sex	F (1, 167) = 0.006477	P=0.9360	ns	P8:Females KO-Veh vs. P90:Females KO-Veh	<0.0001	****
	Magel2-KO	P90	Veh	F	3	18	0.2381±0.008527	Treatment x Sex	F (1, 167) = 0.05626	P=0.8128	ns	P8:Males KO-OXT vs. P8:Females KO-OXT	0.9969	ns
	Magel2-KO	P90	OXT	M	3	24	0.1867±0.01139	Time point x Treatment x Sex	F (1, 167) = 1.315	P=0.2531	ns	P8:Males KO-OXT vs. P90:Males KO-OXT	<0.0001	****
	Magel2-KO	P90	OXT	F	3	23	0.1804±0.01619					P8:Females KO-OXT vs. P90:Females KO-OXT	<0.0001	****
												P90:Males KO-Veh vs. P90:Females KO-Veh	0.987	ns
												P90:Males KO-Veh vs. P90:Males KO-OXT	0.0379	*
												P90:Females KO-Veh vs. P90:Females KO-OXT	0.0009	***
												P90:Males KO-OXT vs. P90:Females KO-OXT	0.9996	ns
Brain region	Genotype	Age	Treatment	Sex	Num. of mice	Num. of datapoints	Mean ± SEM	Source of variation	F (DFn, DFd)	P value	Summary	Tukey's multiple comp. test	Adjusted P Value	Summary
vCA2/CA3	Magel2-KO	P8	Veh	M	3	23	0.1001±0.004882	Time point	F (1, 165) = 187.4	P<0.0001	****	P8:Males KO-Veh vs. P8:Females KO-Veh	0.9965	ns
	Magel2-KO	P8	Veh	F	3	24	0.08966±0.005013	Treatment	F (1, 165) = 0.2855	P=0.5938	ns	P8:Males KO-Veh vs. P8:Males KO-OXT	0.9962	ns
	Magel2-KO	P8	OXT	M	3	19	0.08884±0.004788	Sex	F (1, 165) = 1.993	P=0.1599	ns	P8:Males KO-Veh vs. P90:Males KO-Veh	<0.0001	****
	Magel2-KO	P8	OXT	F	3	16	0.09948±0.003738	Time point x Treatment	F (1, 165) = 0.1925	P=0.6614	ns	P8:Females KO-Veh vs. P8:Females KO-OXT	0.9988	ns
	Magel2-KO	P90	Veh	M	3	24	0.184±0.01392	Time point x Sex	F (1, 165) = 1.966	P=0.1627	ns	P8:Females KO-Veh vs. P90:Females KO-Veh	<0.0001	****
	Magel2-KO	P90	Veh	F	3	24	0.2247±0.01254	Treatment x Sex	F (1, 165) = 0.2886	P=0.5918	ns	P8:Males KO-OXT vs. P8:Females KO-OXT	0.9985	ns
	Magel2-KO	P90	OXT	M	3	20	0.1953±0.01223	Time point x Treatment x Sex	F (1, 165) = 3.616	P=0.0590	ns	P8:Males KO-OXT vs. P90:Males KO-OXT	<0.0001	****
	Magel2-KO	P90	OXT	F	3	23	0.1983±0.01617					P8:Females KO-OXT vs. P90:Females KO-OXT	<0.0001	****
												P90:Males KO-Veh vs. P90:Females KO-Veh	0.1037	ns
												P90:Males KO-Veh vs. P90:Males KO-OXT	0.9955	ns
												P90:Females KO-Veh vs. P90:Females KO-OXT	0.6244	ns
												P90:Males KO-OXT vs. P90:Females KO-OXT	>0.9999	ns
Brain region	Genotype	Age	Treatment	Sex	Num. of mice	Num. of datapoints	Mean ± SEM	Source of variation	F (DFn, DFd)	P value	Summary	Tukey's multiple comp. test	Adjusted P Value	Summary
DG	Magel2-KO	P8	Veh	M	3	24	0.1323±0.003741	Time point	F (1, 168) = 72.99	P<0.0001	****	P8:Males KO-Veh vs. P8:Females KO-Veh	0.5815	ns
	Magel2-KO	P8	Veh	F	3	24	0.1061±0.005792	Treatment	F (1, 168) = 11.15	P=0.0010	**	P8:Males KO-Veh vs. P8:Males KO-OXT	0.9824	ns
	Magel2-KO	P8	OXT	M	3	24	0.1192±0.005407	Sex	F (1, 168) = 0.006045	P=0.9381	ns	P8:Males KO-Veh vs. P90:Males KO-Veh	<0.0001	****
	Magel2-KO	P8	OXT	F	3	15	0.1309±0.006585	Time point x Treatment	F (1, 168) = 16.94	P<0.0001	****	P8:Females KO-Veh vs. P8:Females KO-OXT	0.786	ns
	Magel2-KO	P90	Veh	M	3	23	0.2277±0.01002	Time point x Sex	F (1, 168) = 0.8051	P=0.3709	ns	P8:Females KO-Veh vs. P90:Females KO-Veh	<0.0001	****
	Magel2-KO	P90	Veh	F	3	22	0.1998±0.01464	Treatment x Sex	F (1, 168) = 12.58	P=0.0005	***	P8:Males KO-OXT vs. P8:Females KO-OXT	0.9961	ns
	Magel2-KO	P90	OXT	M	3	20	0.138±0.0115	Time point x Treatment x Sex	F (1, 168) = 1.010	P=0.3163	ns	P8:Males KO-OXT vs. P90:Males KO-OXT	0.9079	ns
	Magel2-KO	P90	OXT	F	3	24	0.1781±0.01654					P8:Females KO-OXT vs. P90:Females KO-OXT	0.0724	ns
												P90:Males KO-Veh vs. P90:Females KO-Veh	0.5467	ns
												P90:Males KO-Veh vs. P90:Males KO-OXT	<0.0001	****
												P90:Females KO-Veh vs. P90:Females KO-OXT	0.8061	ns
												P90:Males KO-OXT vs. P90:Females KO-OXT	0.128	ns
							0.01408
Brain region	Genotype	Age	Treatment	Sex	Num. of mice	Num. of datapoints	Mean ± SEM	Source of variation	F (DFn, DFd)	P value	Summary	Tukey's multiple comp. test	Adjusted P Value	Summary
PVT	Magel2-KO	P8	Veh	M	3	31	0.2526±0.009956	Time point	F (1, 154) = 46.45	P<0.0001	****	P8:Males KO-Veh vs. P8:Females KO-Veh	0.607	ns
	Magel2-KO	P8	Veh	F	3	34	0.2225±0.01083	Treatment	F (1, 154) = 1.364	P=0.2446	ns	P8:Males KO-Veh vs. P8:Males KO-OXT	0.9994	ns
	Magel2-KO	P8	OXT	M	3	28	0.2433±0.01327	Sex	F (1, 154) = 0.008702	P=0.9258	ns	P8:Males KO-Veh vs. P90:Males KO-Veh	0.0207	*
	Magel2-KO	P8	OXT	F	3	26	0.2958±0.01157	Time point x Treatment	F (1, 154) = 14.99	P=0.0002	***	P8:Females KO-Veh vs. P8:Females KO-OXT	0.001	***
	Magel2-KO	P90	Veh	M	3	11	0.174±0.02126	Time point x Sex	F (1, 154) = 0.7385	P=0.3915	ns	P8:Females KO-Veh vs. P90:Females KO-Veh	>0.9999	ns
	Magel2-KO	P90	Veh	F	3	10	0.2314±0.01682	Treatment x Sex	F (1, 154) = 1.135	P=0.2883	ns	P8:Males KO-OXT vs. P8:Females KO-OXT	0.0781	ns
	Magel2-KO	P90	OXT	M	3	11	0.1809±0.03537	Time point x Treatment x Sex	F (1, 154) = 20.74	P<0.0001	****	P8:Males KO-OXT vs. P90:Males KO-OXT	0.1492	ns
	Magel2-KO	P90	OXT	F	3	11	0.1053±0.01408					P8:Females KO-OXT vs. P90:Females KO-OXT	<0.0001	****
												P90:Males KO-Veh vs. P90:Females KO-Veh	0.4984	ns
												P90:Males KO-Veh vs. P90:Males KO-OXT	>0.9999	ns
												P90:Females KO-Veh vs. P90:Females KO-OXT	0.0006	***
												P90:Males KO-OXT vs. P90:Females KO-OXT	0.1399	ns
Brain region	Genotype	Age	Treatment	Sex	Num. of mice	Num. of datapoints	Mean ± SEM	Source of variation	F (DFn, DFd)	P value	Summary	Tukey's multiple comp. test	Adjusted P Value	Summary
MPOA	Magel2-KO	P8	Veh	M	3	18	0.1244±0.007656	Time point	F (1, 163) = 21.49	P<0.0001	****	P8:Males KO-Veh vs. P8:Females KO-Veh	0.9918	ns
	Magel2-KO	P8	Veh	F	3	24	0.1145±0.004122	Treatment	F (1, 163) = 0.6139	P=0.4345	ns	P8:Males KO-Veh vs. P8:Males KO-OXT	0.059	ns
	Magel2-KO	P8	OXT	M	3	26	0.08857±0.005312	Sex	F (1, 163) = 0.04375	P=0.8346	ns	P8:Males KO-Veh vs. P90:Males KO-Veh	0.005	**
	Magel2-KO	P8	OXT	F	3	12	0.1197±0.003785	Time point x Treatment	F (1, 163) = 2.969	P=0.0868	ns	P8:Females KO-Veh vs. P8:Females KO-OXT	>0.9999	ns
	Magel2-KO	P90	Veh	M	3	21	0.07711±0.009611	Time point x Sex	F (1, 163) = 2.351	P=0.1272	ns	P8:Females KO-Veh vs. P90:Females KO-Veh	0.1291	ns
	Magel2-KO	P90	Veh	F	3	24	0.08421±0.007805	Treatment x Sex	F (1, 163) = 0.1934	P=0.6607	ns	P8:Males KO-OXT vs. P8:Females KO-OXT	0.2994	ns
	Magel2-KO	P90	OXT	M	3	23	0.09801±0.01299	Time point x Treatment x Sex	F (1, 163) = 8.569	P=0.0039	**	P8:Males KO-OXT vs. P90:Males KO-OXT	0.9898	ns
	Magel2-KO	P90	OXT	F	3	23	0.07477±0.008905					P8:Females KO-OXT vs. P90:Females KO-OXT	0.0294	*
												P90:Males KO-Veh vs. P90:Females KO-Veh	0.9987	ns
												P90:Males KO-Veh vs. P90:Males KO-OXT	0.6313	ns
												P90:Females KO-Veh vs. P90:Females KO-OXT	0.9909	ns
												P90:Males KO-OXT vs. P90:Females KO-OXT	0.464	ns
Brain region	Genotype	Age	Treatment	Sex	Num. of mice	Num. of datapoints	Mean ± SEM	Source of variation	F (DFn, DFd)	P value	Summary	Tukey's multiple comp. test	Adjusted P Value	Summary
VMH	Magel2-KO	P8	Veh	M	3	24	0.08321±0.004854	Time point	F (1, 151) = 287.5	P<0.0001	****	P8:Males KO-Veh vs. P8:Females KO-Veh	0.7748	ns
	Magel2-KO	P8	Veh	F	3	23	0.06176±0.00556	Treatment	F (1, 151) = 23.20	P<0.0001	****	P8:Males KO-Veh vs. P8:Males KO-OXT	0.4415	ns
	Magel2-KO	P8	OXT	M	3	23	0.05474±0.006667	Sex	F (1, 151) = 28.43	P<0.0001	****	P8:Males KO-Veh vs. P90:Males KO-Veh	<0.0001	****
	Magel2-KO	P8	OXT	F	3	16	0.06639±0.008571	Time point x Treatment	F (1, 151) = 10.57	P=0.0014	**	P8:Females KO-Veh vs. P8:Females KO-OXT	>0.9999	ns
	Magel2-KO	P90	Veh	M	3	22	0.1658±0.01358	Time point x Sex	F (1, 151) = 35.71	P<0.0001	****	P8:Females KO-Veh vs. P90:Females KO-Veh	<0.0001	****
	Magel2-KO	P90	Veh	F	3	15	0.2869±0.01241	Treatment x Sex	F (1, 151) = 1.469	P=0.2273	ns	P8:Males KO-OXT vs. P8:Females KO-OXT	0.9949	ns
	Magel2-KO	P90	OXT	M	3	20	0.1394±0.0115	Time point x Treatment x Sex	F (1, 151) = 11.47	P=0.0009	***	P8:Males KO-OXT vs. P90:Males KO-OXT	<0.0001	****
	Magel2-KO	P90	OXT	F	3	16	0.1904±0.02044					P8:Females KO-OXT vs. P90:Females KO-OXT	<0.0001	****
												P90:Males KO-Veh vs. P90:Females KO-Veh	<0.0001	****
												P90:Males KO-Veh vs. P90:Males KO-OXT	0.6144	ns
												P90:Females KO-Veh vs. P90:Females KO-OXT	<0.0001	****
												P90:Males KO-OXT vs. P90:Females KO-OXT	0.0325	*
Brain region	Genotype	Age	Treatment	Sex	Num. of mice	Num. of datapoints	Mean ± SEM	Source of variation	F (DFn, DFd)	P value	Summary	Tukey's multiple comp. test	Adjusted P Value	Summary
Pir	Magel2-KO	P8	Veh	M	3	20	0.1532±0.005721	Time point	F (1, 130) = 80.99	P<0.0001	****	P8:Males KO-Veh vs. P8:Females KO-Veh	0.9726	ns
	Magel2-KO	P8	Veh	F	3	21	0.1411±0.005241	Treatment	F (1, 130) = 1.814	P=0.1804	ns	P8:Males KO-Veh vs. P8:Males KO-OXT	>0.9999	ns
	Magel2-KO	P8	OXT	M	3	34	0.1568±0.004346	Sex	F (1, 130) = 9.074	P=0.0031	**	P8:Males KO-Veh vs. P90:Males KO-Veh	<0.0001	****
	Magel2-KO	P8	OXT	F	3	15	0.1693±0.006933	Time point x Treatment	F (1, 130) = 13.07	P=0.0004	***	P8:Females KO-Veh vs. P8:Females KO-OXT	0.3801	ns
	Magel2-KO	P90	Veh	M	3	12	0.2699±0.01188	Time point x Sex	F (1, 130) = 9.249	P=0.0029	**	P8:Females KO-Veh vs. P90:Females KO-Veh	0.0008	***
	Magel2-KO	P90	Veh	F	3	12	0.2014±0.01559	Treatment x Sex	F (1, 130) = 7.489	P=0.0071	**	P8:Males KO-OXT vs. P8:Females KO-OXT	0.9657	ns
	Magel2-KO	P90	OXT	M	3	12	0.209±0.009538	Time point x Treatment x Sex	F (1, 130) = 0.9466	P=0.3324	ns	P8:Males KO-OXT vs. P90:Males KO-OXT	0.0024	**
	Magel2-KO	P90	OXT	F	3	12	0.1926±0.02403					P8:Females KO-OXT vs. P90:Females KO-OXT	0.7763	ns
												P90:Males KO-Veh vs. P90:Females KO-Veh	0.0007	***
												P90:Males KO-Veh vs. P90:Males KO-OXT	0.0044	**
												P90:Females KO-Veh vs. P90:Females KO-OXT	0.9993	ns
												P90:Males KO-OXT vs. P90:Females KO-OXT	0.967	ns
