# Supplementary material for: Oxytocin receptors in the Magel2 mouse model of autism: Specific region, age, sex and oxytocin treatment effects
Source: Front Neurosci. 2023 Mar 14;17:1026939. doi: 10.3389/fnins.2023.1026939 (PMC10043208; doi:10.3389/fnins.2023.1026939)
Supplement: Supplementary file 4 [file Table_3.XLSX]

## Sheet: Suppl Table 3
Supplementary table 3 for Fig.4: Datasets and statistical analysis
DATASETS							1 way ANOVA			MULTIPLE COMPARISONS
	Age	Sex	Genotype	Treatment	Num. of mice	Mean ± SEM	F (DFn, DFd)	P value	Summary	Tukey's multiple comp. test	Adjusted P Value	Summary
Fig. 4B	P8	M	WT	Veh	11	263.0 ± 63.18	F(2,50) = 6.359	P=0.0035	**	WT-Veh vs. KO-Veh	0.0054	**
	P8	M	Magel2-KO	Veh	18	94.5 ± 25.29				WT-Veh vs. KO-OXT	0.0064	**
	P8	M	Magel2-KO	OXT	24	105.5 ± 22.19				KO-Veh vs. KO-OXT	0.9629	ns
Fig. 4C	P8	F	WT	Veh	13	290.2 ± 56.42	F(2,44) = 3.981	P=0.0258	*	WT-Veh vs. KO-Veh	0.0409	*
	P8	F	Magel2-KO	Veh	13	133.6 ± 39.83				WT-Veh vs. KO-OXT	0.0457	*
	P8	F	Magel2-KO	OXT	21	152.0 ± 29.57				KO-Veh vs. KO-OXT	0.9425	ns
