# Supplementary material for: Oxytocin receptors in the Magel2 mouse model of autism: Specific region, age, sex and oxytocin treatment effects
Source: Front Neurosci. 2023 Mar 14;17:1026939. doi: 10.3389/fnins.2023.1026939 (PMC10043208; doi:10.3389/fnins.2023.1026939)
Supplement: Supplementary file 5 [file Table_4.XLSX]

## Sheet: Suppl Table 4a 
							2 way ANOVA	Source of variation	F (DFn, DFd)	P value	Summary
Supplementary table 4a for Fig.5A Datasets and statistical analysis								Interaction	F (20, 630) = 3.395	P<0.0001	****
								Brain Area	F (10, 630) = 26.46	P<0.0001	****
								Genotype/Treatment	F (2, 630) = 15.79	P<0.0001	****
								Multiple comparisons parameters
								Number of families	11
								Number of comparisons per family	3
								Alpha	0.05
DATASETS							MULTIPLE COMPARISONS (simple effects within rows)
Brain region	Group	Age	Sex	Num. of mice	Num. of datapoints	Mean ± SEM	Tukey's multiple comp. test	Mean Diff.	95.00% CI of diff.	Adjusted P Value	Summary
LS	WT-Veh	P90	M	3	24	0.158±0.0165	WT-Veh vs. KO-Veh	-0.03627	-0.07925 to 0.006722	0.1175	ns
	KO-Veh	P90	M	3	24	0.1943±0.01612	WT-Veh vs. KO-OXT	-0.008838	-0.05279 to 0.03512	0.8843	ns
	KO-OXT	P90	M	3	22	0.1669±0.009667	KO-Veh vs. KO-OXT	0.02743	-0.01653 to 0.07138	0.3081	ns
CeA	WT-Veh	P90	M	3	22	0.1019±0.01252	WT-Veh vs. KO-Veh	-0.05716	-0.1021 to -0.01226	0.0081	**
	KO-Veh	P90	M	3	22	0.1591±0.01236	WT-Veh vs. KO-OXT	0.01729	-0.03003 to 0.06462	0.6667	ns
	KO-OXT	P90	M	3	18	0.08461±0.01329	KO-Veh vs. KO-OXT	0.07446	0.02713 to 0.1218	0.0007	***
MeA	WT-Veh	P90	M	3	22	0.1347±0.01444	WT-Veh vs. KO-Veh	-0.05026	-0.09467 to -0.005852	0.0219	*
	KO-Veh	P90	M	3	23	0.1849±0.01378	WT-Veh vs. KO-OXT	-0.01153	-0.05643 to 0.03337	0.8183	ns
	KO-OXT	P90	M	3	22	0.1462±0.01277	KO-Veh vs. KO-OXT	0.03873	-0.005682 to 0.08314	0.1016	ns
BLA	WT-Veh	P90	M	3	20	0.08061±0.0123	WT-Veh vs. KO-Veh	-0.05985	-0.1054 to -0.01432	0.0059	**
	KO-Veh	P90	M	3	23	0.1405±0.01296	WT-Veh vs. KO-OXT	-0.03588	-0.08241 to 0.01064	0.1665	ns
	KO-OXT	P90	M	3	21	0.1165±0.01566	KO-Veh vs. KO-OXT	0.02397	-0.02098 to 0.06892	0.4226	ns
dCA2/CA3	WT-Veh	P90	M	3	24	0.1518±0.01502	WT-Veh vs. KO-Veh	-0.07441	-0.1174 to -0.03142	0.0002	***
	KO-Veh	P90	M	3	24	0.2262±0.01027	WT-Veh vs. KO-OXT	-0.03493	-0.07792 to 0.008058	0.137	ns
	KO-OXT	P90	M	3	24	0.1867±0.01139	KO-Veh vs. KO-OXT	0.03948	-0.003507 to 0.08247	0.0794	ns
vCA2/CA3	WT-Veh	P90	M	3	20	0.233±0.01756	WT-Veh vs. KO-Veh	0.04896	0.003873 to 0.09405	0.0295	*
	KO-Veh	P90	M	3	24	0.184±0.01392	WT-Veh vs. KO-OXT	0.03761	-0.009484 to 0.08470	0.1465	ns
	KO-OXT	P90	M	3	20	0.1953±0.01223	KO-Veh vs. KO-OXT	-0.01135	-0.05644 to 0.03373	0.8247	ns
DG	WT-Veh	P90	M	3	23	0.1428±0.01397	WT-Veh vs. KO-Veh	-0.0849	-0.1288 to -0.04099	<0.0001	****
	KO-Veh	P90	M	3	23	0.2277±0.01002	WT-Veh vs. KO-OXT	0.004739	-0.04079 to 0.05027	0.9676	ns
	KO-OXT	P90	M	3	20	0.138±0.0115	KO-Veh vs. KO-OXT	0.08964	0.04411 to 0.1352	<0.0001	****
PVT	WT-Veh	P90	M	3	12	0.1849±0.01332	WT-Veh vs. KO-Veh	0.01092	-0.05124 to 0.07308	0.9104	ns
	KO-Veh	P90	M	3	11	0.174±0.02126	WT-Veh vs. KO-OXT	0.004063	-0.05810 to 0.06622	0.9871	ns
	KO-OXT	P90	M	3	11	0.1809±0.03537	KO-Veh vs. KO-OXT	-0.00686	-0.07036 to 0.05664	0.9651	ns
MPOA	WT-Veh	P90	M	3	20	0.07528±0.009934	WT-Veh vs. KO-Veh	-0.001833	-0.04836 to 0.04469	0.9953	ns
	KO-Veh	P90	M	3	21	0.07711±0.009611	WT-Veh vs. KO-OXT	-0.02273	-0.06826 to 0.02280	0.4697	ns
	KO-OXT	P90	M	3	23	0.09801±0.01299	KO-Veh vs. KO-OXT	-0.0209	-0.06585 to 0.02404	0.5191	ns
VMH	WT-Veh	P90	M	3	22	0.1916±0.01965	WT-Veh vs. KO-Veh	0.02586	-0.01904 to 0.07076	0.3664	ns
	KO-Veh	P90	M	3	22	0.1658±0.01358	WT-Veh vs. KO-OXT	0.05227	0.006264 to 0.09828	0.0213	*
	KO-OXT	P90	M	3	20	0.1394±0.0115	KO-Veh vs. KO-OXT	0.02641	-0.01960 to 0.07242	0.3689	ns
Pir	WT-Veh	P90	M	3	12	0.2291±0.01563	WT-Veh vs. KO-Veh	-0.04076	-0.1016 to 0.02004	0.2572	ns
	KO-Veh	P90	M	3	12	0.2699±0.01188	WT-Veh vs. KO-OXT	0.02006	-0.04073 to 0.08086	0.7183	ns
	KO-OXT	P90	M	3	12	0.209±0.009538	KO-Veh vs. KO-OXT	0.06082	2.686e-005 to 0.1216	0.0499	*

## Sheet: Suppl Table 4b
							2 way ANOVA	Source of variation	F (DFn, DFd)	P value	Summary
Supplementary table 4b for Fig.5B Datasets and statistical analysis								Interaction	F (20, 619) = 2.337	P=0.0009	***
								Brain Area	F (10, 619) = 27.89	P<0.0001	****
								Genotype/Treatment	F (2, 619) = 67.51	P<0.0001	****
								Multiple comparisons parameters
								Number of families	11
								Number of comparisons per family	3
								Alpha	0.05
DATASETS							MULTIPLE COMPARISONS (simple effects within rows)
Brain region	Group	Age	Sex	Num. of mice	Num. of datapoints	Mean ± SEM	Tukey's multiple comp. test	Mean Diff.	95.00% CI of diff.	Adjusted P Value	Summary
LS	WT-Veh	P90	F	3	16	0.2464±0.01419	WT-Veh vs. KO-Veh	0.06843	0.01406 to 0.1228	0.009	**
	KO-Veh	P90	F	3	24	0.178±0.01008	WT-Veh vs. KO-OXT	0.1041	0.04975 to 0.1585	<0.0001	****
	KO-OXT	P90	F	3	24	0.1423±0.01339	KO-Veh vs. KO-OXT	0.03568	-0.01295 to 0.08431	0.1971	ns
CeA	WT-Veh	P90	F	3	23	0.1922±0.0118	WT-Veh vs. KO-Veh	0.03662	-0.01488 to 0.08813	0.2174	ns
	KO-Veh	P90	F	3	20	0.1556±0.01369	WT-Veh vs. KO-OXT	0.0661	0.01526 to 0.1169	0.0066	**
	KO-OXT	P90	F	3	21	0.1261±0.01553	KO-Veh vs. KO-OXT	0.02948	-0.02315 to 0.08211	0.3868	ns
MeA	WT-Veh	P90	F	3	23	0.2517±0.01544	WT-Veh vs. KO-Veh	0.06703	0.01679 to 0.1173	0.0051	**
	KO-Veh	P90	F	3	22	0.1847±0.0162	WT-Veh vs. KO-OXT	0.09706	0.04791 to 0.1462	<0.0001	****
	KO-OXT	P90	F	3	24	0.1547±0.01262	KO-Veh vs. KO-OXT	0.03004	-0.01969 to 0.07976	0.3316	ns
BLA	WT-Veh	P90	F	3	23	0.1767±0.01343	WT-Veh vs. KO-Veh	0.04374	-0.005412 to 0.09290	0.0926	ns
	KO-Veh	P90	F	3	24	0.1329±0.01074	WT-Veh vs. KO-OXT	0.05043	-0.001799 to 0.1027	0.0611	ns
	KO-OXT	P90	F	3	19	0.1262±0.01374	KO-Veh vs. KO-OXT	0.006682	-0.04505 to 0.05841	0.9505	ns
dCA2/CA3	WT-Veh	P90	F	3	24	0.2232±0.01419	WT-Veh vs. KO-Veh	-0.01488	-0.06741 to 0.03764	0.7835	ns
	KO-Veh	P90	F	3	18	0.2381±0.008527	WT-Veh vs. KO-OXT	0.04286	-0.006295 to 0.09202	0.1017	ns
	KO-OXT	P90	F	3	23	0.1804±0.01619	KO-Veh vs. KO-OXT	0.05775	0.004732 to 0.1108	0.0289	*
vCA2/CA3	WT-Veh	P90	F	3	21	0.3096±0.01428	WT-Veh vs. KO-Veh	0.08489	0.03455 to 0.1352	0.0002	***
	KO-Veh	P90	F	3	24	0.2247±0.01254	WT-Veh vs. KO-OXT	0.1113	0.06047 to 0.1622	<0.0001	****
	KO-OXT	P90	F	3	23	0.1983±0.01617	KO-Veh vs. KO-OXT	0.02643	-0.02273 to 0.07558	0.4167	ns
DG	WT-Veh	P90	F	3	24	0.2261±0.01134	WT-Veh vs. KO-Veh	0.02631	-0.02342 to 0.07603	0.4283	ns
	KO-Veh	P90	F	3	22	0.1998±0.01464	WT-Veh vs. KO-OXT	0.04799	-0.0006422 to 0.09662	0.054	ns
	KO-OXT	P90	F	3	24	0.1781±0.01654	KO-Veh vs. KO-OXT	0.02168	-0.02804 to 0.07140	0.5617	ns
PVT	WT-Veh	P90	F	3	12	0.182±0.02392	WT-Veh vs. KO-Veh	-0.04948	-0.1216 to 0.02265	0.2415	ns
	KO-Veh	P90	F	3	10	0.2314±0.01682	WT-Veh vs. KO-OXT	0.07668	0.006362 to 0.1470	0.0287	*
	KO-OXT	P90	F	3	11	0.1053±0.01408	KO-Veh vs. KO-OXT	0.1262	0.05255 to 0.1998	0.0002	***
MPOA	WT-Veh	P90	F	3	16	0.1248±0.01327	WT-Veh vs. KO-Veh	0.04061	-0.01376 to 0.09498	0.186	ns
	KO-Veh	P90	F	3	24	0.08421±0.007805	WT-Veh vs. KO-OXT	0.05005	-0.004793 to 0.1049	0.082	ns
	KO-OXT	P90	F	3	23	0.07477±0.008905	KO-Veh vs. KO-OXT	0.009441	-0.03971 to 0.05860	0.8939	ns
VMH	WT-Veh	P90	F	3	23	0.3432±0.03977	WT-Veh vs. KO-Veh	0.0563	0.0003960 to 0.1122	0.0479	*
	KO-Veh	P90	F	3	15	0.2869±0.01241	WT-Veh vs. KO-OXT	0.1527	0.09790 to 0.2076	<0.0001	****
	KO-OXT	P90	F	3	16	0.1904±0.02044	KO-Veh vs. KO-OXT	0.09644	0.03590 to 0.1570	0.0006	***
Pir	WT-Veh	P90	F	3	12	0.3018±0.01071	WT-Veh vs. KO-Veh	0.1004	0.03162 to 0.1692	0.0019	**
	KO-Veh	P90	F	3	12	0.2014±0.01559	WT-Veh vs. KO-OXT	0.1092	0.04041 to 0.1780	0.0006	***
	KO-OXT	P90	F	3	12	0.1926±0.02403	KO-Veh vs. KO-OXT	0.008784	-0.05999 to 0.07756	0.9516	ns
